# Supplementary material for: Metagenome analysis of viruses associated with Anopheles mosquitoes from Ramu Upazila, Cox’s Bazar District, Bangladesh
Source: PeerJ. 2025 Mar 31;13:e19180. doi: 10.7717/peerj.19180 (PMC11967434; doi:10.7717/peerj.19180)
Supplement: Supplemental Information 1 [file peerj-13-19180-s001.xlsx]

## Sheet: Table_S1
Anopheles pool number	NGS library number	Number of mosquitoes	Total num of NGS reads	Total number of virus reads	Morphological species	Anopheles Sex	Feeding Status	Mosquito collection date	Mosquito collection site	GPS coordinates	SRA (SRR accession)	GenBank accession
P0630	28323	11	652456	2075	An. vagus	Male	N/A	2019-02-23	Bangladesh: Cox's Bazar District	21.48 N 92.11 E	SAMN32544005	OR367390
P0650	28327	10	671726	520	An. vagus	Male	N/A	2019-02-23	Bangladesh: Cox's Bazar District	21.48 N 92.11 E	SAMN32544009
P0685	28332	6	737694	43081	An. kochi	Male	N/A	2019-02-23	Bangladesh: Cox's Bazar District	21.43 N 92.16 E	SAMN32544014	OR367400
P0693	28334	1	546432	101	An. vagus	Male	N/A	2019-02-23	Bangladesh: Cox's Bazar District	21.43 N 92.16 E	SAMN32544016
P0696	28336	1	784038	0	An. vagus	Male	N/A	2019-02-23	Bangladesh: Cox's Bazar District	21.43 N 92.16 E	SAMN32544018
P0786	28337	1	920142	0	An. peditaeniatus	Male	N/A	2019-02-24	Bangladesh: Cox's Bazar District	21.50 N 92.08 E	SAMN32544019
P0837	28340	10	618450	1164	An. vagus	Male	N/A	2019-02-25	Bangladesh: Cox's Bazar District	21.50 N 92.08 E	SAMN32544022	OR367404
P0853	28343	10	731842	127	An. vagus	Male	N/A	2019-02-25	Bangladesh: Cox's Bazar District	21.50 N 92.08 E	SAMN32544025
P0866	28345	5	710632	66	An. vagus	Male	N/A	2019-02-25	Bangladesh: Cox's Bazar District	21.50 N 92.08 E	SAMN32544027
P0914	28347	5	1304714	1712	An. vagus	Male	N/A	2019-03-09	Bangladesh: Cox's Bazar District	21.43 N 92.15 E	SAMN32544029
P0919	28348	10	854078	10	An. vagus	Male	N/A	2019-03-09	Bangladesh: Cox's Bazar District	21.43 N 92.15 E	SAMN32544030
P0929	28349	3	1047604	21653	An. vagus	Male	N/A	2019-03-09	Bangladesh: Cox's Bazar District	21.43 N 92.15 E	SAMN32544031	OR367405, OR367406
P0949	28353	4	851580	0	An. vagus	Male	N/A	2019-03-09	Bangladesh: Cox's Bazar District	21.43 N 92.15 E	SAMN32544035
P0953	28354	5	481658	22	An. vagus	Male	N/A	2019-03-09	Bangladesh: Cox's Bazar District	21.43 N 92.15 E	SAMN32544036
P0981	28358	10	591436	1149	An. vagus	Male	N/A	2019-03-09	Bangladesh: Cox's Bazar District	21.44 N 92.15 E	SAMN32544040
P1015	28359	10	679582	4120	An. vagus	Male	N/A	2019-03-09	Bangladesh: Cox's Bazar District	21.43 N 92.15 E	SAMN32544041	OR367410, OR367411, OR367412, OR367414, OR367415, OR367416
P1061	28364	1	1279728	0	An. vagus	Male	N/A	2019-03-09	Bangladesh: Cox's Bazar District	21.48 N 92.11 E	SAMN32544046
P1161	28368	1	1999196	1964	An. vagus	Male	N/A	2019-03-09	Bangladesh: Cox's Bazar District	21.48 N 92.11 E	SAMN32544050
P1166	28371	2	1800778	0	An. vagus	Male	N/A	2019-03-09	Bangladesh: Cox's Bazar District	21.48 N 92.11 E	SAMN32544053
P1210	28375	1	878752	0	An. jamesii	Male	N/A	2019-03-09	Bangladesh: Cox's Bazar District	21.48 N 92.11 E	SAMN32544057	OR367340, OR367341, OR367342, OR367343
P1211	28376	1	2676478	66	An. vagus	Male	N/A	2019-03-09	Bangladesh: Cox's Bazar District	21.48 N 92.11 E	SAMN32544058
P1245	28379	2	646762	10	An. vagus	Male	N/A	2019-03-09	Bangladesh: Cox's Bazar District	21.48 N 92.11 E	SAMN32544061
P1553	28386	4	695074	2	An. vagus	Male	N/A	2019-03-11	Bangladesh: Cox's Bazar District	21.50 N 92.08 E	SAMN32544068
P1597	28393	3	858898	0	An. vagus	Male	N/A	2019-03-11	Bangladesh: Cox's Bazar District	21.50 N 92.08 E	SAMN32544074
P1600	28394	3	1063968	1	An. vagus	Male	N/A	2019-03-11	Bangladesh: Cox's Bazar District	21.50 N 92.08 E	SAMN32544075
P1604	28396	10	574376	8781	An. vagus	Male	N/A	2019-03-11	Bangladesh: Cox's Bazar District	21.50 N 92.08 E	SAMN32544077	OR367419
P0322	21381	1	666474	123492	An. philippinensis	Male	N/A	2018-12-12	Bangladesh: Cox's Bazar District	21.44 N 92.15 E	SAMN32306666
P0340	21385	10	511544	36884	An. sp	Male	N/A	2019-01-10	Bangladesh: Cox's Bazar District	21.48 N 92.11 E	SAMN32306670
P0374	21386	1	397950	18968	An. sp	Male	N/A	2019-01-10	Bangladesh: Cox's Bazar District	21.48 N 92.11 E	SAMN32306671
P0422	21391	10	269424	34981	An. sp	Male	N/A	2019-02-22	Bangladesh: Cox's Bazar District	21.48 N 92.11 E	SAMN32306676
P0439	21394	9	586590	2777	An. vagus	Male	N/A	2019-02-22	Bangladesh: Cox's Bazar District	21.48 N 92.11 E	SAMN32306679
P0463	21397	11	322724	1499	An. sp	Male	N/A	2019-02-22	Bangladesh: Cox's Bazar District	21.48 N 92.11 E	SAMN32306682
P0698	21398	1	698728	277	An. vagus	Male	N/A	2019-02-24	Bangladesh: Cox's Bazar District	21.43 N 92.15 E	SAMN32306683
P0542	21400	10	865532	58597	An. sp	Male	N/A	2019-02-22	Bangladesh: Cox's Bazar District	21.48 N 92.11 E	SAMN32306685
P0699	21406	1	545728	0	An. vagus	Male	N/A	2019-02-24	Bangladesh: Cox's Bazar District	21.43 N 92.16 E	SAMN32306691
P0714	21410	1	515034	4	An. vagus	Male	N/A	2019-02-24	Bangladesh: Cox's Bazar District	21.37 N 92.16 E	SAMN32306695
P0715	21411	2	540132	24024	An. vagus	Male	N/A	2019-02-24	Bangladesh: Cox's Bazar District	21.37 N 92.16 E	SAMN32306696
P0727	21415	1	498868	17979	An. vagus	Male	N/A	2019-02-24	Bangladesh: Cox's Bazar District	21.43 N 92.16 E	SAMN32306700
P0763	21417	7	407440	53979	An. peditaeniatus	Male	N/A	2019-02-24	Bangladesh: Cox's Bazar District	21.50 N 92.08 E	SAMN32306702
P0780	21420	1	556662	39	An. vagus	Male	N/A	2019-02-24	Bangladesh: Cox's Bazar District	21.50 N 92.08 E	SAMN32306705
P0873	21426	3	553440	15146	An. vagus	Male	N/A	2019-03-08	Bangladesh: Cox's Bazar District	21.43 N 92.15 E	SAMN32306711
P0876	21427	10	718394	43544	An. vagus	Male	N/A	2019-03-08	Bangladesh: Cox's Bazar District	21.43 N 92.15 E	SAMN32306712
P0896	21431	1	725940	0	An. vagus	Male	N/A	2019-03-08	Bangladesh: Cox's Bazar District	21.43 N 92.15 E	SAMN32306716
P0897	21432	3	582234	35386	An. vagus	Male	N/A	2019-03-08	Bangladesh: Cox's Bazar District	21.43 N 92.15 E	SAMN32306717
P0912	21436	1	608840	0	An. vagus	Male	N/A	2019-03-08	Bangladesh: Cox's Bazar District	21.43 N 92.15 E	SAMN32306721
P1259	21437	9	891600	0	An. vagus	Male	N/A	2019-03-10	Bangladesh: Cox's Bazar District	21.48 N 92.11 E	SAMN32306722
P1282	21442	8	783770	26357	An. vagus	Male	N/A	2019-03-10	Bangladesh: Cox's Bazar District	21.48 N 92.11 E	SAMN32306727
P1290	21443	3	466320	7832	An. vagus	Male	N/A	2019-03-10	Bangladesh: Cox's Bazar District	21.48 N 92.11 E	SAMN32306728	OR367349
P1340	21449	7	574942	6	An. vagus	Male	N/A	2019-03-10	Bangladesh: Cox's Bazar District	21.48 N 92.11 E	SAMN32306733
P1489	21453	10	517370	818	An. vagus	Male	N/A	2019-03-10	Bangladesh: Cox's Bazar District	21.48 N 92.11 E	SAMN32543808
P1650	21465	10	484548	3484	An. vagus	Male	N/A	2019-04-12	Bangladesh: Cox's Bazar District	21.48 N 92.11 E	SAMN32543818
P0013	21566	2	199958	298	An. sp	Male	N/A	2018-11-15	Bangladesh: Cox's Bazar District	21.50 N 92.09 E	SAMN32543827
P0269	21570	1	375314	700	An. jeyporiensis	Male	N/A	2018-11-15	Bangladesh: Cox's Bazar District	21.48 N 92.11 E	SAMN32543831
P0273	21573	2	680654	105	An. sp	Male	N/A	2018-11-15	Bangladesh: Cox's Bazar District	21.48 N 92.11 E	SAMN32543834
P0278	28285	7	574738	10418	An. sp	Male	N/A	2018-12-14	Bangladesh: Cox's Bazar District	21.50 N 92.08 E	SAMN32543845	OR367373
P0321	28299	1	788652	2	An. sp	Male	N/A	2018-12-14	Bangladesh: Cox's Bazar District	21.48 N 92.11 E	SAMN32543859
P0324	28301	1	690826	7	An. sp	Male	N/A	2018-12-13	Bangladesh: Cox's Bazar District	21.44 N 92.15 E	SAMN32543861
P0325	28302	1	757142	0	An. sp	Male	N/A	2018-12-13	Bangladesh: Cox's Bazar District	21.43 N 92.16 E	SAMN32543862
P0406	28307	1	695952	196	An. vagus	Male	N/A	2019-01-11	Bangladesh: Cox's Bazar District	21.48 N 92.11 E	SAMN32543867
P0592	28314	1	582444	0	An. vagus	Male	N/A	2019-02-23	Bangladesh: Cox's Bazar District	21.48 N 92.11 E	SAMN32543874
P0593	28315	3	656518	67	An. vagus	Male	N/A	2019-02-23	Bangladesh: Cox's Bazar District	21.48 N 92.11 E	SAMN32543875
P0617	28321	2	637066	31219	An. vagus	Male	N/A	2019-02-23	Bangladesh: Cox's Bazar District	21.48 N 92.11 E	SAMN32543881	OR367387, OR367388
P0619	28322	10	632754	10370	An. vagus	Male	N/A	2019-02-23	Bangladesh: Cox's Bazar District	21.48 N 92.11 E	SAMN32543882	OR367389
P0642	28324	1	742724	33750	An. barbirostris	Female	Unfed	2019-02-23	Bangladesh: Cox's Bazar District	21.48 N 92.11 E	SAMN32544006	OR367391, OR367392
P0648	28326	2	731412	30145	An. vagus	Female	Unfed	2019-02-23	Bangladesh: Cox's Bazar District	21.48 N 92.11 E	SAMN32544008	OR367394, OR367395, OR367396
P0676	28329	4	622738	2	An. vagus	Female	Unfed	2019-02-23	Bangladesh: Cox's Bazar District	21.43 N 92.16 E	SAMN32544011
P0680	28330	1	668064	6	An. kochi	Female	Unfed	2019-02-23	Bangladesh: Cox's Bazar District	21.43 N 92.16 E	SAMN32544012
P0681	28331	4	678196	59470	An. kochi	Female	Unfed	2019-02-23	Bangladesh: Cox's Bazar District	21.43 N 92.16 E	SAMN32544013	OR367398, OR367399
P0694	28335	2	985788	14379	An. vagus	Female	Unfed	2019-02-23	Bangladesh: Cox's Bazar District	21.43 N 92.16 E	SAMN32544017
P0829	28339	8	679572	820	An. vagus	Female	Unfed	2019-02-25	Bangladesh: Cox's Bazar District	21.50 N 92.08 E	SAMN32544021
P0851	28342	2	950506	460	An. vagus	Female	Unfed	2019-02-25	Bangladesh: Cox's Bazar District	21.50 N 92.08 E	SAMN32544024
P0946	28352	3	1343136	14004	An. varuna	Female	Unfed	2019-03-09	Bangladesh: Cox's Bazar District	21.43 N 92.15 E	SAMN32544034	OR367407, OR367408
P0958	28355	4	851296	52	An. vagus	Female	Unfed	2019-03-09	Bangladesh: Cox's Bazar District	21.43 N 92.15 E	SAMN32544037
P0962	28356	8	1084896	2784	An. vagus	Female	Unfed	2019-03-09	Bangladesh: Cox's Bazar District	21.44 N 92.15 E	SAMN32544038	OR367409
P1026	28360	3	398852	2676	An. vagus	Female	Unfed	2019-03-09	Bangladesh: Cox's Bazar District	21.43 N 92.15 E	SAMN32544042
P1029	28361	10	916510	1106	An. vagus	Female	Unfed	2019-03-09	Bangladesh: Cox's Bazar District	21.43 N 92.15 E	SAMN32544043
P1041	28362	5	869488	8102	An. vagus	Female	Unfed	2019-03-09	Bangladesh: Cox's Bazar District	21.48 N 92.11 E	SAMN32544044
P1046	28363	10	1024548	444	An. vagus	Female	Unfed	2019-03-09	Bangladesh: Cox's Bazar District	21.48 N 92.11 E	SAMN32544045
P1148	28366	8	852200	16437	An. vagus	Female	Unfed	2019-03-09	Bangladesh: Cox's Bazar District	21.48 N 92.11 E	SAMN32544048
P1156	28367	5	895110	477	An. vagus	Female	Unfed	2019-03-09	Bangladesh: Cox's Bazar District	21.48 N 92.11 E	SAMN32544049
P1168	28372	10	866956	731	An. peditaeniatus	Female	Unfed	2019-03-09	Bangladesh: Cox's Bazar District	21.48 N 92.11 E	SAMN32544054
P1178	28373	10	1182542	1076	An. vagus	Female	Unfed	2019-03-09	Bangladesh: Cox's Bazar District	21.48 N 92.11 E	SAMN32544055	OR367417
P1209	28374	1	950076	4323	An. vagus	Female	Unfed	2019-03-09	Bangladesh: Cox's Bazar District	21.48 N 92.11 E	SAMN32544056
P1212	28377	10	858194	845	An. vagus	Female	Unfed	2019-03-09	Bangladesh: Cox's Bazar District	21.48 N 92.11 E	SAMN32544059
P1247	28380	3	745618	979	An. peditaeniatus	Female	Unfed	2019-03-09	Bangladesh: Cox's Bazar District	21.48 N 92.11 E	SAMN32544062
P1552	28385	1	957974	15692	An. vagus	Female	Unfed	2019-03-11	Bangladesh: Cox's Bazar District	21.50 N 92.08 E	SAMN32544067	OR367418
P1575	28388	5	1078992	319	An. subpictus	Female	Unfed	2019-03-11	Bangladesh: Cox's Bazar District	21.50 N 92.08 E	SAMN32544070
P1595	28392	2	913216	0	An. vagus	Female	Unfed	2019-03-11	Bangladesh: Cox's Bazar District	21.50 N 92.08 E	SAMN32544073
P1618	28397	5	886434	3903	An. vagus	Female	Unfed	2019-03-11	Bangladesh: Cox's Bazar District	21.50 N 92.08 E	SAMN32544078	OR367420
P1709	28399	1	1699184	1	An. peditaeniatus	Female	Unfed	2019-04-14	Bangladesh: Cox's Bazar District	21.43 N 92.05 E	SAMN32544080
P1711	28400	4	1016016	378	An. peditaeniatus	Female	Unfed	2019-04-15	Bangladesh: Cox's Bazar District	21.50 N 92.08 E	SAMN32544081
P0118	21375	6	788942	16874	An. peditaeniatus	Female	Unfed	2018-11-14	Bangladesh: Cox's Bazar District	21.48 N 92.10 E	SAMN32306660
P0234	21376	3	658514	50	An. karwari	Female	Unfed	2018-11-14	Bangladesh: Cox's Bazar District	21.50 N 92.11 E	SAMN32306661
P0237	21377	4	474610	2	An. karwari	Female	Unfed	2018-11-14	Bangladesh: Cox's Bazar District	21.48 N 92.11 E	SAMN32306662
P0241	21378	4	1052880	9	An. karwari	Female	Unfed	2018-11-14	Bangladesh: Cox's Bazar District	21.50 N 92.11 E	SAMN32306663
P0245	21379	10	701764	4788	An. jeyporiensis	Female	Unfed	2018-11-14	Bangladesh: Cox's Bazar District	21.50 N 92.11 E	SAMN32306664
P0328	21383	10	504192	3637	An. jeyporiensis	Female	Unfed	2019-01-10	Bangladesh: Cox's Bazar District	21.48 N 92.11 E	SAMN32306668
P0376	21388	10	512248	863	An. jeyporiensis	Female	Unfed	2019-01-10	Bangladesh: Cox's Bazar District	21.48 N 92.11 E	SAMN32306673
P0410	21390	2	455402	0	An. kochi	Female	Unfed	2019-02-22	Bangladesh: Cox's Bazar District	21.48 N 92.11 E	SAMN32306675
P0435	21393	4	99908	735	An. vagus	Female	Unfed	2019-02-22	Bangladesh: Cox's Bazar District	21.48 N 92.11 E	SAMN32306678
P0450	21396	10	470464	1352	An. peditaeniatus	Female	Unfed	2019-02-22	Bangladesh: Cox's Bazar District	21.48 N 92.11 E	SAMN32306681
P0532	21402	7	903434	14751	An. peditaeniatus	Female	Unfed	2019-02-22	Bangladesh: Cox's Bazar District	21.48 N 92.11 E	SAMN32306687
P0525	21404	4	699876	19908	An. peditaeniatus	Female	Unfed	2019-02-22	Bangladesh: Cox's Bazar District	21.48 N 92.11 E	SAMN32306689
P0723	21405	2	828524	1	An. vagus	Female	Unfed	2019-02-24	Bangladesh: Cox's Bazar District	21.43 N 92.16 E	SAMN32306690
P0712	21409	2	231948	368	An. barbirostris	Female	Unfed	2019-02-24	Bangladesh: Cox's Bazar District	21.37 N 92.16 E	SAMN32306694
P0520	21413	5	517198	5286	An. umbrosus	Female	Unfed	2019-02-22	Bangladesh: Cox's Bazar District	21.48 N 92.11 E	SAMN32306698
P0728	21416	11	399114	24046	An. peditaeniatus	Female	Unfed	2019-02-24	Bangladesh: Cox's Bazar District	21.50 N 92.08 E	SAMN32306701	OR367344
P0770	21418	8	803914	98	An. peditaeniatus	Female	Unfed	2019-02-24	Bangladesh: Cox's Bazar District	21.50 N 92.08 E	SAMN32306703
P0781	21421	2	378686	5610	An. peditaeniatus	Female	Unfed	2019-02-24	Bangladesh: Cox's Bazar District	21.50 N 92.08 E	SAMN32306706
P0783	21422	1	331800	18842	An. vagus	Female	Unfed	2019-02-24	Bangladesh: Cox's Bazar District	21.50 N 92.08 E	SAMN32306707	OR367345
P0787	21424	11	430306	237506	An. peditaeniatus	Female	Unfed	2019-02-24	Bangladesh: Cox's Bazar District	21.50 N 92.08 E	SAMN32306709
P0890	21429	5	691746	3649	An. vagus	Female	Unfed	2019-03-08	Bangladesh: Cox's Bazar District	21.43 N 92.15 E	SAMN32306714
P0895	21430	1	1295842	237	An. vagus	Female	Unfed	2019-03-08	Bangladesh: Cox's Bazar District	21.43 N 92.15 E	SAMN32306715
P0900	21433	7	606082	1691	An. peditaeniatus	Female	Unfed	2019-03-08	Bangladesh: Cox's Bazar District	21.43 N 92.15 E	SAMN32306718
P0908	21435	4	610942	2399	An. vagus	Female	Unfed	2019-03-08	Bangladesh: Cox's Bazar District	21.43 N 92.15 E	SAMN32306720
P1268	21438	2	876644	4281	An. vagus	Female	Unfed	2019-03-10	Bangladesh: Cox's Bazar District	21.48 N 92.11 E	SAMN32306723	OR367346
P1276	21440	1	385458	8130	An. vagus	Female	Unfed	2019-03-10	Bangladesh: Cox's Bazar District	21.48 N 92.11 E	SAMN32306725	OR367348
P1293	21444	2	494096	28	An. vagus	Female	Unfed	2019-03-10	Bangladesh: Cox's Bazar District	21.48 N 92.11 E	SAMN32306729
P1304	21447	2	564704	795	An. vagus	Female	Unfed	2019-03-10	Bangladesh: Cox's Bazar District	21.48 N 92.11 E	SAMN32306732	OR367351
P1447	21452	10	772706	14391	An. vagus	Female	Unfed	2019-03-10	Bangladesh: Cox's Bazar District	21.48 N 92.11 E	SAMN32543807	OR367353, OR367354, OR367355
P1534	21455	3	392896	435	An. peditaeniatus	Female	Unfed	2019-03-10	Bangladesh: Cox's Bazar District	21.50 N 92.08 E	SAMN32543810
P1546	21459	1	472104	4827	An. vagus	Female	Unfed	2019-03-10	Bangladesh: Cox's Bazar District	21.50 N 92.08 E	SAMN32543812	OR367356
P1547	21460	1	595366	3214	An. vagus	Female	Unfed	2019-03-10	Bangladesh: Cox's Bazar District	21.50 N 92.08 E	SAMN32543813	OR367357
P1640	21464	10	315554	5430	An. peditaeniatus	Female	Unfed	2019-04-12	Bangladesh: Cox's Bazar District	21.48 N 92.11 E	SAMN32543817	OR367358, OR367359, OR367360, OR367361
P1702	21466	3	605470	3228	An. peditaeniatus	Female	Unfed	2019-04-12	Bangladesh: Cox's Bazar District	21.48 N 92.11 E	SAMN32543819	OR367362
P1705	21467	1	658684	0	An. umbrosus	Female	Unfed	2019-04-12	Bangladesh: Cox's Bazar District	21.48 N 92.11 E	SAMN32543820
P1706	21468	2	305724	0	An. peditaeniatus	Female	Unfed	2019-04-12	Bangladesh: Cox's Bazar District	21.48 N 92.11 E	SAMN32543821
P0007	21562	1	496594	10618	An. subpictus	Female	Unfed	2018-11-15	Bangladesh: Cox's Bazar District	21.50 N 92.09 E	SAMN32543823	OR367364, OR367365, OR367366
P0010	21564	1	662588	566	An. karwari	Female	Unfed	2018-11-15	Bangladesh: Cox's Bazar District	21.50 N 92.08 E	SAMN32543825
P0028	21568	10	504198	6415	An. karwari	Female	Unfed	2018-11-15	Bangladesh: Cox's Bazar District	21.50 N 92.09 E	SAMN32543829
P0272	21572	1	617728	3558	An. subpictus	Female	Unfed	2018-11-15	Bangladesh: Cox's Bazar District	21.48 N 92.11 E	SAMN32543833
P0001	21574	2	789018	11	An. karwari	Female	Unfed	2018-11-16	Bangladesh: Cox's Bazar District	21.43 N 92.15 E	SAMN32543835
P0003	21575	1	585624	262	An. subpictus	Female	Unfed	2018-11-16	Bangladesh: Cox's Bazar District	21.43 N 92.16 E	SAMN32543836
P0004	21576	2	598474	403	An. karwari	Female	Unfed	2018-11-16	Bangladesh: Cox's Bazar District	21.43 N 92.15 E	SAMN32543837
P0086	21577	1	427026	3184	An. minimus	Female	Unfed	2018-11-16	Bangladesh: Cox's Bazar District	21.50 N 92.09 E	SAMN32543838
P1710	21578	1	488260	43	An. peditaeniatus	Female	Unfed	2019-04-15	Bangladesh: Cox's Bazar District	21.50 N 92.08 E	SAMN32543839
P0277	28284	1	628548	0	An. varuna	Female	Unfed	2018-12-14	Bangladesh: Cox's Bazar District	21.50 N 92.08 E	SAMN32543844
P0285	28286	2	685514	172	An. philippinensis	Female	Unfed	2018-12-14	Bangladesh: Cox's Bazar District	21.50 N 92.08 E	SAMN32543846
P0287	28287	1	648566	0	An. peditaeniatus	Female	Unfed	2018-12-14	Bangladesh: Cox's Bazar District	21.50 N 92.08 E	SAMN32543847
P0288	28288	10	773026	4027	An. kochi	Female	Unfed	2018-12-13	Bangladesh: Cox's Bazar District	21.48 N 92.11 E	SAMN32543848
P0298	28289	2	1084154	108	An. sp	Female	Unfed	2018-12-13	Bangladesh: Cox's Bazar District	21.48 N 92.11 E	SAMN32543849
P0300	28290	8	588784	4245	An. jeyporiensis	Female	Unfed	2018-12-13	Bangladesh: Cox's Bazar District	21.48 N 92.11 E	SAMN32543850	OR367374
P0310	28292	1	702002	2991	An. peditaeniatus	Female	Unfed	2018-12-13	Bangladesh: Cox's Bazar District	21.48 N 92.11 E	SAMN32543852
P0311	28293	2	782982	16348	An. sp	Female	Unfed	2018-12-13	Bangladesh: Cox's Bazar District	21.48 N 92.11 E	SAMN32543853	OR367375
P0313	28294	1	931884	1667	An. vagus	Female	Unfed	2018-12-14	Bangladesh: Cox's Bazar District	21.48 N 92.11 E	SAMN32543854
P0316	28297	1	688378	30162	An. vagus	Female	Unfed	2018-12-14	Bangladesh: Cox's Bazar District	21.48 N 92.11 E	SAMN32543857	OR367376, OR367377, OR367378
P0407	28308	1	514702	286	An. kochi	Female	Unfed	2019-01-11	Bangladesh: Cox's Bazar District	21.50 N 92.08 E	SAMN32543868
P0591	28313	1	682096	33299	An. vagus	Female	Unfed	2019-02-23	Bangladesh: Cox's Bazar District	21.48 N 92.11 E	SAMN32543873	OR367384
P0599	28317	1	698322	1640	An. barbirostris	Female	Unfed	2019-02-23	Bangladesh: Cox's Bazar District	21.48 N 92.11 E	SAMN32543877	OR367386
P0616	28320	1	715714	4	An. vagus	Female	Unfed	2019-02-23	Bangladesh: Cox's Bazar District	21.48 N 92.11 E	SAMN32543880
